# Supplementary material
Source: PubMed Central journal article supplement (PMC4547048)
Supplement: NIHMS693405-supplement-2.pdf [file NIHMS693405-supplement-2.pdf]

## SUPPLEMENTARY TABLES

**Supplementary Table 1. Data collection statistics for metal ion identification.**

| <b>Data collection statistics</b>  | <b>Zn<sup>2+</sup> Peak</b>                           | <b>Zn<sup>2+</sup> lowE</b>                           | <b>Cu<sup>2+</sup> Peak</b>                           | <b>Cu<sup>2+</sup> lowE</b>                           |
|------------------------------------|-------------------------------------------------------|-------------------------------------------------------|-------------------------------------------------------|-------------------------------------------------------|
| Space group                        | <i>P</i> 2 <sub>1</sub> 2 <sub>1</sub> 2 <sub>1</sub> |
| Cell dimensions                    |                                                       |                                                       |                                                       |                                                       |
| <i>a</i> , <i>b</i> , <i>c</i> (Å) | 113.5, 114.2, 149.6                                   | 113.9, 142.3, 150.4                                   | 114.2, 138.5, 151.6                                   | 114.0, 138.7, 151.4                                   |
| $\alpha$ , $\beta$ , $\gamma$ (°)  | 90.0, 90.0, 90.0                                      | 90.0, 90.0, 90.0                                      | 90.0, 90.0, 90.0                                      | 90.0, 90.0, 90.0                                      |
| Resolution (Å)                     | 90.6-4.5 (5.0-4.5) <sup>a</sup>                       | 90.8-4.5 (5.0-4.5)                                    | 91.2-4.0 (4.4-4.0)                                    | 91.1-4.5 (5.0-4.5)                                    |
| Total no. observations             | 203091 (58522)                                        | 202269 (58194)                                        | 162680 (39482)                                        | 205189 (59218)                                        |
| No. unique observations            | 14786 (4125)                                          | 14975 (4187)                                          | 20836 (4893)                                          | 14756 (4110)                                          |
| Multiplicity                       | 13.7 (14.2)                                           | 13.5 (13.9)                                           | 7.8 (8.1)                                             | 12.2 (6.4)                                            |
| Data completeness (%)              | 99.9 (99.8)                                           | 99.6 (99.7)                                           | 99.7 (99.5)                                           | 99.8 (99.8)                                           |
| <i>R</i> <sub>merge</sub>          | 0.162 (0.390)                                         | 0.186 (0.577)                                         | 0.131 (0.429)                                         | 0.191 (0.440)                                         |
| <i>R</i> <sub>r.i.m.</sub>         | 0.174 (0.419)                                         | 0.191 (0.595)                                         | 0.148 (0.483)                                         | 0.203 (0.467)                                         |
| <i>R</i> <sub>p.i.m.</sub>         | 0.063 (0.152)                                         | 0.053 (0.163)                                         | 0.052 (0.168)                                         | 0.054 (0.122)                                         |
| <i>I</i> / $\sigma$ ( <i>I</i> )   | 12.8 (7.2)                                            | 11.0 (4.4)                                            | 11.9 (4.8)                                            | 12.2 (6.4)                                            |

<sup>a</sup>Values in parentheses refer to the highest resolution shell

**Supplementary Table 2. Contacts at the proposed AnAPN1 dimer interface.**

| Domain | Molecule | Residue     | Contact                            | Molecule                                  | Residue                                                     |
|--------|----------|-------------|------------------------------------|-------------------------------------------|-------------------------------------------------------------|
| III    | A        | Asn529      | Hydrophobic                        | B                                         | Phe931                                                      |
|        | A        | Arg531      | H bond, Salt bridge<br>Hydrophobic | B                                         | Asp653<br>Leu654, Arg655, Met935                            |
|        | A        | Ile540      | Hydrophobic                        | B                                         | Phe931, Leu934                                              |
|        | A        | Ser542      | Hydrophobic                        | B                                         | Phe931                                                      |
|        | A        | Asp549      | Hydrophobic                        | B                                         | Pro553, Lys551                                              |
|        | A        | Arg550      | Hydrophobic                        | B                                         | Pro553, Val552, Lys551                                      |
|        | A        | Lys551      | H bond<br>Hydrophobic              | B                                         | Lys551<br>Asp549, Arg550, Val552,<br>Pro553, Ser649, Gly650 |
|        | A        | Val552      | Hydrophobic                        | B                                         | Pro553, Val552, Lys551                                      |
|        | A        | Pro553      | Hydrophobic                        | B                                         | Lys551, Arg550, Asp549,<br>Ser649                           |
|        | A        | Lys584      | Hydrophobic                        | B                                         | Asp926, Asn929, Gly930,<br>Phe931, Leu934                   |
|        | A        | Ala585      | Hydrophobic                        | B                                         | Asn929, Phe931, Gly930,<br>Leu934                           |
|        | A        | Arg587      | Hydrophobic                        | B                                         | Glu692, Leu934, Asn938                                      |
|        | IV       | A           | Glu614                             | Hydrophobic                               | B                                                           |
| A      |          | Ser649      | Hydrophobic                        | B                                         | Lys551                                                      |
| A      |          | Gly650      | Hydrophobic                        | B                                         | Lys551, Gly650                                              |
| A      |          | Asp653      | H bond, Salt bridge                | B                                         | Arg531                                                      |
| A      |          | Leu654      | Hydrophobic                        | B                                         | Arg531                                                      |
| A      |          | Arg655      | Hydrophobic                        | B                                         | Arg531, Asp535                                              |
| A      |          | Arg659      | Hydrophobic                        | B                                         | Asp535                                                      |
| A      |          | Glu692      | Hydrophobic                        | B                                         | Arg587                                                      |
| A      |          | Asp926      | Hydrophobic                        | B                                         | Thr555, Ile557, Thr583,<br>Lys584                           |
| A      |          | Asn929      | Hydrophobic                        | B                                         | Thr583, Lys584, Ala585,<br>Ala586, Arg587                   |
| A      |          | Gly930      | Hydrophobic                        | B                                         | Thr583, Lys584, Ala585,<br>Ala586, Arg587                   |
| A      |          | Phe931      | Hydrophobic                        | B                                         | Ile540, Lys584, Ala585,<br>Ala586                           |
| A      |          | Leu934      | Hydrophobic                        | B                                         | Thr583, Lys584, Ala585,<br>Ala586, Arg587                   |
| A      |          | Met935      | Hydrophobic                        | B                                         | Arg531, Ser533, Ile540                                      |
| A      | Ser937   | Hydrophobic | B                                  | Arg587                                    |                                                             |
| A      | Asn938   | Hydrophobic | B                                  | Arg532, Ser533, Asp535,<br>Asn538, Arg587 |                                                             |

**Supplementary Table 3. Antibody Epitopes on AnAPN1.** The human major histocompatibility complex II alleles present in the human population that correspond to each epitope described in this study are provided. It is important to note the numerous Class II alleles indicated in peptide 7 (P7) with several predicted binding peptides present; including alleles found in target populations in Sub-Saharan Africa, where a malaria transmission-blocking vaccine will have a tremendous impact<sup>8</sup>. Note that peptides 4 (P4) and 5 (P5) are part of the peptide 7 epitope recognized by monoclonal antibody 4H5B7. Peptide 1 (P1) is recognized by mAb 2A12, which does not block *P. falciparum*. The peptide 9 epitope has been described previously<sup>8</sup>.

| Peptide | Amino acids | Sequence                   | MHC II Alleles                      |
|---------|-------------|----------------------------|-------------------------------------|
| P1      | 60-74       | DERYRLPTTSIPIHY            | DR4/DR7                             |
| P4      | 107-121     | VMHNRGLVMSSAKVS            | DR1/DR3/DR4/DR7/DR8/DR11/DR13/DR15  |
| P5      | 95-109      | IQLQVVQATDKLVMH            | DR1/DR3/ DR4/DR7/DR8/DR11/DR13/DR15 |
| P7      | 98-123      | QVVQATDKLVMHNRGLVMSSAKVSSL | DR1/DR3/DR4/DR7/DR8/DR11/DR13/DR15  |
| P9      | 173-194     | TNDDGFYVSSYVADNGERRYLA     | DR3/DR4/DR8/DR11                    |
